# Supplementary material for: Molecular Evolution of Multiple Arylalkylamine N-Acetyltransferase (AANAT) in Fish
Source: Mar Drugs. 2011 May 24;9(5):906–21. doi: 10.3390/md9050906 (PMC3111191; doi:10.3390/md9050906)
Supplement: Supplementary file 1 [file marinedrugs-09-00906-s001.pdf]

**Table S1.** Binding stability values of enzyme-substrate complexes.

|         | Complex rank | Serotonin | Tryptamine | Dopamine | Phenylethylamine |
|---------|--------------|-----------|------------|----------|------------------|
| AANAT1a | 1            | 3540      | 3466       | 3064     | 2954             |
|         | 2            | 3418      | 3270       | 3030     | 2870             |
|         | 3            | 3400      | 3222       | 2874     | 2840             |
|         | 4            | 3364      | 3218       | 2822     | 2704             |
|         | 5            | 3220      | 3016       | 2768     | 2632             |
|         | 6            | 3124      | 2962       | 2580     | 2604             |
|         | 7            | 2936      | 2896       | 2578     | 2536             |
|         | 8            | 2920      | 2854       | 2546     | 2452             |
|         | 9            | 2824      | 2826       | 2516     | 2388             |
|         | 10           | 2814      | 2790       | 2492     | 2382             |
|         | 11           | 2770      | 2732       | 2486     | 2368             |
|         | 12           | 2762      | 2702       | 2436     | 2276             |
|         | 13           | 2756      | 2674       | 2392     | 2268             |
|         | 14           | 2730      | 2590       | 2368     | 2150             |
|         | 15           | 2672      | 2578       | 2310     | 2140             |
|         | 16           | 2618      | 2526       | 2228     | 2130             |
|         | 17           | 2604      | 2480       | 2226     | 2116             |
|         | 18           | 2548      | 2436       | 2188     | 2110             |
|         | 19           | 2498      | 2410       | 2162     | 2078             |
|         | 20           | 2494      | 2368       |          | 2072             |
| AANAT2  | 1            | 3506      | 3428       | 3076     | 2944             |
|         | 2            | 3394      | 3380       | 2902     | 2834             |
|         | 3            | 3232      | 2986       | 2890     | 2716             |
|         | 4            | 3074      | 2974       | 2780     | 2666             |
|         | 5            | 3024      | 2910       | 2718     | 2528             |
|         | 6            | 2994      | 2904       | 2718     | 2434             |
|         | 7            | 2964      | 2762       | 2656     | 2396             |
|         | 8            | 2934      | 2736       | 2634     | 2358             |
|         | 9            | 2916      | 2700       | 2528     | 2354             |
|         | 10           | 2754      | 2696       | 2464     | 2352             |
|         | 11           | 2752      | 2696       | 2438     | 2326             |
|         | 12           | 2750      | 2688       | 2430     | 2294             |
|         | 13           | 2738      | 2652       | 2398     | 2238             |
|         | 14           | 2730      | 2584       | 2370     | 2194             |
|         | 15           | 2722      | 2564       | 2370     | 2150             |
|         | 16           | 2680      | 2454       | 2366     | 2134             |
|         | 17           | 2654      | 2450       | 2338     | 2126             |
|         | 18           | 2648      | 2390       | 2328     | 2070             |
|         | 19           | 2632      | 2380       | 2284     | 2062             |
|         | 20           | 2626      | 2378       | 2240     | 2060             |

**Table S1. Cont.**

|                  | Complex rank | Serotonin | Tryptamine | Dopamine | Phenylethylamine |
|------------------|--------------|-----------|------------|----------|------------------|
| $\beta$ 5-AANAT2 | 1            | 3500      | 3452       | 3104     | 2982             |
|                  | 2            | 3456      | 3408       | 3030     | 2930             |
|                  | 3            | 3362      | 2912       | 2958     | 2878             |
|                  | 4            | 2196      | 2910       | 2810     | 2598             |
|                  | 5            | 3188      | 2904       | 2634     | 2434             |
|                  | 6            | 2964      | 2900       | 2616     | 2374             |
|                  | 7            | 2934      | 2756       | 2560     | 2358             |
|                  | 8            | 2924      | 2722       | 2528     | 2354             |
|                  | 9            | 2754      | 2720       | 2500     | 2326             |
|                  | 10           | 2752      | 2710       | 2492     | 2292             |
|                  | 11           | 2750      | 2696       | 2464     | 2194             |
|                  | 12           | 2748      | 2688       | 2446     | 2184             |
|                  | 13           | 2746      | 2646       | 2444     | 2180             |
|                  | 14           | 2738      | 2594       | 2430     | 2152             |
|                  | 15           | 2722      | 2584       | 2370     | 2134             |
|                  | 16           | 2654      | 2522       | 2366     | 2126             |
|                  | 17           | 2632      | 2510       | 2314     | 2070             |
|                  | 18           | 2626      | 2506       | 2284     | 2062             |
|                  | 19           | 2626      | 2454       | 2246     | 2060             |
|                  | 20           | 2546      | 2448       | 2194     | 2020             |
